# Supplementary material for: Tunable Polymeric Mixed Micellar Nanoassemblies of Lutrol F127/Gelucire 44/14 for Oral Delivery of Praziquantel: A Promising Nanovector against Hymenolepis nana in Experimentally-Infected Rats
Source: MDPI journal article supplement (doi:10.3390/pharmaceutics14102023), 2022-09-23
Supplement: s1 [file s1]

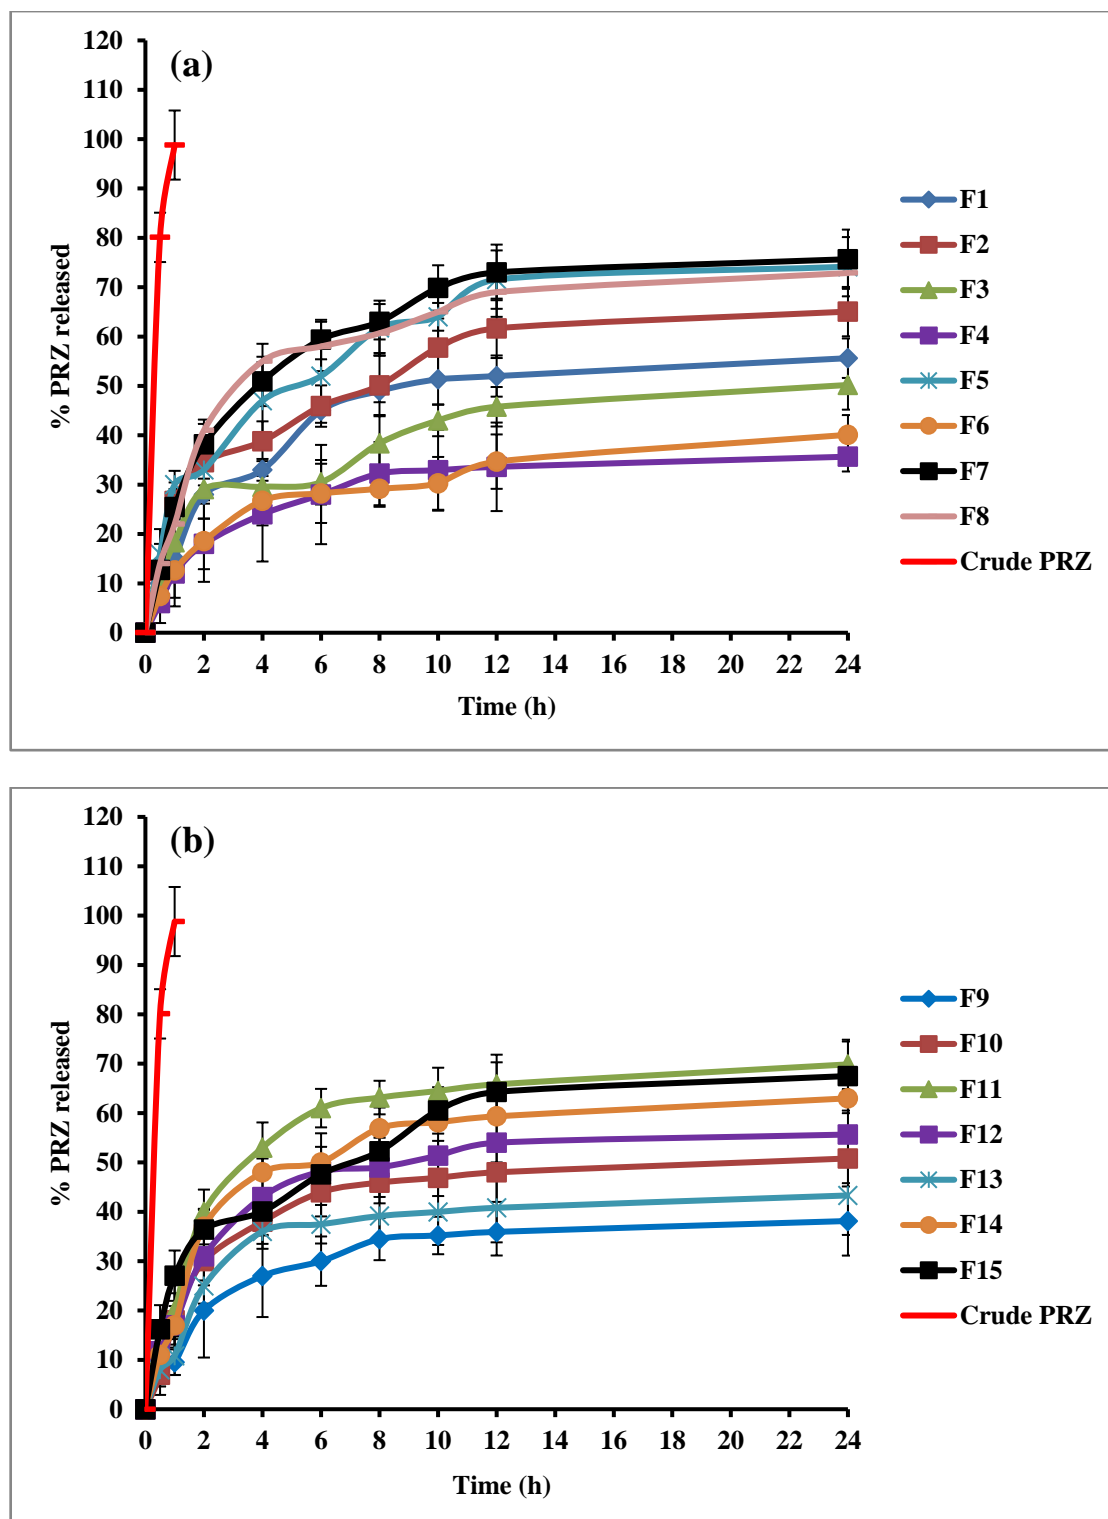

Figure S1. In vitro release profiles of PRZ from crude drug and various PMMs formulations: (a) F1-F8 and (b) F9-F15.

Table S1. Kinetic parameters of PRZ release from the micellar dispersions

| Formulation | Zero-order kinetics | First-order kinetics | Higuchi kinetics | Release order    |
|-------------|---------------------|----------------------|------------------|------------------|
|             | $Q = K_0 t$         | $LnQ = K_1 t$        | $Q = Kt^{1/2}$   |                  |
|             | R <sup>2</sup>      |                      |                  |                  |
| F1          | 0.8297              | 0.8129               | 0.8788           | Higuchi kinetics |
| F2          | 0.8731              | 0.8630               | 0.9501           | Higuchi kinetics |
| F3          | 0.8429              | 0.8441               | 0.8987           | Higuchi kinetics |
| F4          | 0.8608              | 0.9288               | 0.9759           | Higuchi kinetics |
| F5          | 0.8439              | 0.9411               | 0.9169           | First-order      |
| F6          | 0.8762              | 0.9325               | 0.9763           | Higuchi kinetics |
| F7          | 0.8565              | 0.8745               | 0.8062           | First-order      |
| F8          | 0.8828              | 0.9679               | 0.8878           | First-order      |
| F9          | 0.8865              | 0.9455               | 0.9853           | Higuchi kinetics |
| F10         | 0.9338              | 0.9022               | 0.8964           | Zero order       |
| F11         | 0.7895              | 0.8024               | 0.8730           | Higuchi kinetics |
| F12         | 0.9532              | 0.9343               | 0.9765           | Higuchi kinetics |
| F13         | 0.9154              | 0.9077               | 0.8268           | Zero-order       |
| F14         | 0.9363              | 0.9557               | 0.9874           | Higuchi kinetics |
| F15         | 0.9541              | 0.9566               | 0.9669           | Higuchi kinetics |

Data represent mean  $\pm$  SD (n = 3).
